# Supplementary material
Source: HighWire-hosted journal article supplement (https://bmjopen.bmj.com/content/13/5/e069371)
Supplement: inline-supplementary-material-2 [file inline-supplementary-material-2.pdf]

## Appendix 2: Interview Participants by Speciality, Profession &amp; Health Board.

| Speciality & Profession                                                                                                                           | Health Board(s)                                  | Total (n=203) |
|---------------------------------------------------------------------------------------------------------------------------------------------------|--------------------------------------------------|---------------|
| <b>Mental Health</b><br><i>*consultant, nurse, psychologist, therapist, counsellor, assessor, technician, management, assistant &amp; trainee</i> | ABUHB, BCUHB, CAVUHB, CMTUHB, HDUHB, PTHB, SBUHB | 52            |
| <b>Speech and Language</b><br><i>*therapist, assistant, head of department</i>                                                                    | ABUHB, BCUHB, CMTUHB, PTHB, SBUHB                | 29            |
| <b>Physiotherapy</b><br><i>*therapist, senior lead</i>                                                                                            | ABUHB, BCUHB, CAVUHB, CMTUHB, HDUHB, PTHB, SBUHB | 22            |
| <b>General Practice (GPs) &amp; Out of Hours GP</b><br><i>*doctor, nurse</i>                                                                      | BCUHB, CAVUHB, CMTUHB, PTHB, SBUHB               | 16            |
| <b>Occupational Therapy</b><br><i>*therapist, technician</i>                                                                                      | ABUHB, BCUHB, SBUHB                              | 9             |
| <b>Child Health &amp; Paediatrics</b><br><i>*consultant, nurse, medical secretary, advisor</i>                                                    | ABUHB, BCUHB, PTUB, SBUHB                        | 9             |
| <b>Dietetics</b><br><i>*dietitian</i>                                                                                                             | BCUHB, CAVUHB, CMTUHB, PTHB                      | 6             |
| <b>Health Visitor</b>                                                                                                                             | SBUHB                                            | 6             |
| <b>Podiatry</b><br><i>*therapist, consultant</i>                                                                                                  | CAVUHB                                           | 2             |
| <b>Oncology</b><br><i>*consultant</i>                                                                                                             | SBUHB                                            | 3             |
| <b>Respiratory Medicine</b><br><i>*nurse, consultant, team lead</i>                                                                               | ABUHB, PTHB, SBUHB                               | 3             |
| <b>Booking Centre</b><br><i>*administration staff</i>                                                                                             | PTHB, SBUHB                                      | 3             |
| <b>Trauma &amp; Orthopaedics</b><br><i>*consultant, surgeon, administration</i>                                                                   | ABUHB, CAVUHB                                    | 3             |
| <b>Rheumatology</b><br><i>*consultant, director, therapist</i>                                                                                    | ABUHB                                            | 5             |
| <b>Neurology</b><br><i>*nurse, consultant</i>                                                                                                     | ABUHB, PTHB, SBUHB                               | 3             |
| <b>Cardiology</b><br><i>*nurse</i>                                                                                                                | BCUHB, SBUHB                                     | 2             |
| <b>Community Nursery Nurse</b><br><i>*nurse</i>                                                                                                   | SBUHB                                            | 2             |
| <b>Plastic Surgery</b><br><i>*surgeon</i>                                                                                                         | CMTUHB, SBUHB                                    | 2             |
| <b>Ward Management</b><br><i>*nurse, therapist</i>                                                                                                | ABUHB, SBUHB                                     | 2             |
| <b>Gynaecology</b><br><i>*doctor, associate specialist</i>                                                                                        | ABUHB, CMTUHB                                    | 2             |
| <b>Sexual Health</b><br><i>*adviser</i>                                                                                                           | CAVUHB                                           | 2             |
| <b>Neurosurgery</b><br><i>*nurse, associate specialist</i>                                                                                        | CMTUHB                                           | 2             |
| <b>Renal Medicine</b><br><i>*nurse</i>                                                                                                            | BCUHB                                            | 1             |
| <b>Community Continence</b><br><i>*nurse</i>                                                                                                      | SBUHB                                            | 1             |
| <b>Orthotics</b><br><i>*orthoptist</i>                                                                                                            | ABUHB                                            | 1             |
| <b>Dental</b><br><i>*dentist</i>                                                                                                                  | SBUHB                                            | 1             |
| <b>Audiology</b>                                                                                                                                  | ABUHB                                            | 1             |
| <b>Diabetes</b>                                                                                                                                   | ABUHB                                            | 1             |

|                                                      |              |   |
|------------------------------------------------------|--------------|---|
| <i>*nurse</i>                                        |              |   |
| <b>Otolaryngology</b><br><i>*medical secretary</i>   | SBUHB        | 1 |
| <b>Fertility</b><br><i>*associate specialist</i>     | SBUHB        | 1 |
| <b>Ophthalmology</b><br><i>*surgeon, optometrist</i> | ABUHB, SBUHB | 2 |
| <b>Clinical Genetics</b><br><i>*consultant</i>       | CAVUHB       | 1 |
| <b>Dermatology</b><br><i>*nurse</i>                  | ABUHB        | 1 |
| <b>Infectious Diseases</b><br><i>*consultant</i>     | CAVUHB       | 1 |
| <b>Social Care</b><br><i>*MDT</i>                    | ABUHB        | 1 |
| <b>Stroke Management</b><br><i>*nurse</i>            | SBUHB        | 1 |
| <b>Anaesthetics Care</b><br><i>*doctor</i>           | ABUHB        | 1 |
| <b>Lymphedema</b><br><i>*therapist</i>               | SBUHB        | 1 |
| <b>Gastroenterology</b><br><i>*consultant</i>        | CMTUHB       | 1 |
