# Supplementary material
Source: HighWire-hosted journal article supplement (https://bmjopen.bmj.com/content/13/5/e069371)
Supplement: inline-supplementary-material-3 [file inline-supplementary-material-3.pdf]

## Appendix 3 Participant Demographics

|                                            | <b>Proportion</b> |
|--------------------------------------------|-------------------|
| <b>Age</b>                                 |                   |
| 18-25 Years                                | 0%                |
| 26-35 Years                                | 29%               |
| 36-45 Years                                | 21%               |
| 46-55 Years                                | 40%               |
| 56-65 Years                                | 9%                |
| 65 Over                                    | 1%                |
| <b>Gender</b>                              |                   |
| Male                                       | 26%               |
| Female                                     | 74%               |
| <b>Ethnicity</b>                           |                   |
| White                                      | 84%               |
| Black, African, Caribbean or Black British | 1%                |
| Asian or Asian British                     | 14%               |
| Mixed or multiple Ethnic Groups            | 1%                |
